# Supplementary material
Source: PubMed Central journal article supplement (PMC2785273)
Supplement: 0910310106_0910310106SI.pdf [file 0910310106_0910310106SI.pdf]

# Supporting Information

van Rood et al. 10.1073/pnas.0910310106

Table S1. Characteristics of 1,121 study participants

| Patient Characteristics                                                                   | Matched CBU | 1 HLA Mismatch, NIMA |           | 2 HLA Mismatch, NIMA |           |
|-------------------------------------------------------------------------------------------|-------------|----------------------|-----------|----------------------|-----------|
|                                                                                           |             | Match                | No Match  | Match                | No Match  |
| (number)                                                                                  | (62)        | (25)                 | (363)     | (54)                 | (617)     |
| <b>Patient Gender:</b>                                                                    |             |                      |           |                      |           |
| Male                                                                                      | 35 (56%)    | 13 (52%)             | 206 (57%) | 28 (52%)             | 346 (56%) |
| Female                                                                                    | 27 (44%)    | 12 (48%)             | 157 (43%) | 26 (48%)             | 271 (44%) |
| <b>Age (years):</b>                                                                       |             |                      |           |                      |           |
| 0–4                                                                                       | 26 (42%)    | 7 (28%)              | 134 (37%) | 14 (26%)             | 130 (21%) |
| 5–9                                                                                       | 14 (23%)    | 8 (32%)              | 98 (27%)  | 9 (17%)              | 130 (21%) |
| 10–19                                                                                     | 11 (18%)    | 6 (24%)              | 75 (21%)  | 13 (24%)             | 170 (28%) |
| ≥20                                                                                       | 11 (18%)    | 4 (16%)              | 56 (15%)  | 18 (33%)             | 187 (30%) |
| Mean                                                                                      | 12.4        | 13.1                 | 11.5      | 18.1                 | 17.1      |
| Median                                                                                    | 6.4         | 8.9                  | 6.9       | 13.0                 | 11.9      |
| Range                                                                                     | 1 m–61 y    | 4 m–48 y             | 10 m–67 y | 1 y–58 y             | 3 m–65 y  |
| <b>Ethnic Background:</b>                                                                 |             |                      |           |                      |           |
| Asian                                                                                     | 2 (3%)      | 2 (8%)               | 12 (3%)   | 4 (8%)               | 25 (4%)   |
| African                                                                                   | 2 (3%)      | 1 (4%)               | 37 (10%)  | 11 (21%)             | 127 (21%) |
| Hispanic                                                                                  | 12 (20%)    | 5 (21%)              | 68 (19%)  | 14 (26%)             | 122 (20%) |
| Caucasian                                                                                 | 43 (73%)    | 15 (62%)             | 221 (62%) | 21 (40%)             | 301 (50%) |
| Other                                                                                     | 0 (0%)      | 1 (4%)               | 16 (5%)   | 3 (6%)               | 25 (4%)   |
| Unknown                                                                                   | 3           | 1                    | 9         | 1                    | 17        |
| <b>Diagnosis:</b>                                                                         |             |                      |           |                      |           |
| ALL                                                                                       | 27 (44%)    | 8 (32%)              | 152 (42%) | 18 (33%)             | 246 (40%) |
| AML                                                                                       | 19 (31%)    | 8 (32%)              | 128 (35%) | 22 (41%)             | 199 (32%) |
| CML                                                                                       | 3 (6%)      | 1 (4%)               | 23 (6%)   | 7 (13%)              | 82 (13%)  |
| Other Leukemia                                                                            | 6 (10%)     | 1 (4%)               | 15 (4%)   | 3 (6%)               | 25 (4%)   |
| Lymphoma                                                                                  | 1 (2%)      | 4 (16%)              | 17 (5%)   | 4 (7%)               | 23 (4%)   |
| Myelodysplasia                                                                            | 6 (10%)     | 3 (12%)              | 28 (8%)   | 0 (0%)               | 42 (7%)   |
| <b>Stage of ALL, AML, CML: (12 not advanced, but not known if early or intermediate):</b> |             |                      |           |                      |           |
| Early                                                                                     | 15 (33%)    | 8 (50%)              | 78 (28%)  | 11 (25%)             | 129 (26%) |
| Intermediate                                                                              | 25 (54%)    | 5 (31%)              | 132 (47%) | 13 (30%)             | 228 (46%) |
| Advanced                                                                                  | 6 (13%)     | 3 (19%)              | 73 (26%)  | 20 (45%)             | 140 (28%) |
| Unknown                                                                                   | 1           | 1                    | 6         | 1                    | 3         |
| <b>Prior Transplant:</b>                                                                  |             |                      |           |                      |           |
| Allogeneic                                                                                | 0 (0%)      | 1 (4%)               | 10 (3%)   | 2 (4%)               | 22 (4%)   |
| Autologous                                                                                | 5 (9%)      | 1 (4%)               | 16 (5%)   | 2 (4%)               | 42 (7%)   |
| None                                                                                      | 49 (91%)    | 22 (92%)             | 306 (92%) | 46 (92%)             | 504 (89%) |
| Unknown                                                                                   | 8           | 1                    | 31        | 1                    | 49        |
| <b>Conditioning Regimen:</b>                                                              |             |                      |           |                      |           |
| TBI + Cyph                                                                                | 6 (13%)     | 3 (14%)              | 73 (23%)  | 8 (17%)              | 133 (25%) |
| TBI + Other                                                                               | 18 (38%)    | 11 (50%)             | 115 (37%) | 19 (40%)             | 216 (40%) |
| Bu + Cyph                                                                                 | 11 (23%)    | 3 (14%)              | 54 (17%)  | 6 (12%)              | 77 (14%)  |
| Other Myeloabl.                                                                           | 10 (21%)    | 3 (14%)              | 62 (20%)  | 12 (25%)             | 84 (16%)  |
| Non-Myeloabl.                                                                             | 2 (4%)      | 2 (9%)               | 7 (2%)    | 3 (6%)               | 26 (5%)   |
| Unknown                                                                                   | 15          | 3                    | 52        | 6                    | 81        |
| <b>GvHD Prophylaxis:</b>                                                                  |             |                      |           |                      |           |
| CSA, no MTX                                                                               | 33 (69%)    | 17 (94%)             | 216 (78%) | 34 (79%)             | 355 (73%) |
| MTX, no CSA                                                                               | 6 (12%)     | 0 (0%)               | 13 (5%)   | 2 (5%)               | 18 (4%)   |
| CSA + MTX                                                                                 | 7 (15%)     | 1 (6%)               | 38 (14%)  | 5 (12%)              | 74 (15%)  |
| Tacrolimus                                                                                | 2 (4%)      | 0 (0%)               | 9 (3%)    | 1 (2%)               | 34 (7%)   |
| Other/None                                                                                | 0 (0%)      | 0 (0%)               | 2 (1%)    | 1 (2%)               | 6 (1%)    |
| Unknown                                                                                   | 14          | 7                    | 85        | 11                   | 130       |
| <b>Center Experience with NYBC CBUs:</b>                                                  |             |                      |           |                      |           |
| Non-U.S.                                                                                  | 14 (23%)    | 4 (16%)              | 97 (27%)  | 14 (26%)             | 132 (25%) |
| U.S. <50 CBUs                                                                             | 30 (48%)    | 13 (52%)             | 177 (49%) | 26 (48%)             | 242 (39%) |
| U.S. ≥50 CBUs                                                                             | 18 (29%)    | 8 (32%)              | 89 (25%)  | 14 (26%)             | 223 (36%) |
| <b>Year of Transplant:</b>                                                                |             |                      |           |                      |           |
| 1993–1996                                                                                 | 13 (21%)    | 6 (24%)              | 62 (17%)  | 5 (9%)               | 90 (15%)  |
| 1997–1999                                                                                 | 15 (24%)    | 8 (32%)              | 132 (36%) | 24 (44%)             | 211 (34%) |
| 2000–2002                                                                                 | 9 (15%)     | 4 (16%)              | 64 (18%)  | 13 (24%)             | 147 (24%) |
| 2003–2006                                                                                 | 25 (40%)    | 7 (28%)              | 105 (29%) | 12 (22%)             | 169 (27%) |
| <b>Total Nucleated Cell (TNC) Dose (x 10<sup>7</sup>/kg):</b>                             |             |                      |           |                      |           |
| 0.7–2.4                                                                                   | 15 (19%)    | 5 (20%)              | 73 (20%)  | 14 (26%)             | 151 (24%) |
| 2.5–4.9                                                                                   | 21 (29%)    | 12 (48%)             | 137 (38%) | 23 (43%)             | 252 (41%) |
| 5.0–9.9                                                                                   | 18 (31%)    | 5 (20%)              | 93 (26%)  | 14 (26%)             | 155 (25%) |
| ≥10.0                                                                                     | 8 (22%)     | 3 (12%)              | 60 (17%)  | 3 (6%)               | 59 (10%)  |
| Mean*                                                                                     | 4.3         | 4.2                  | 4.7       | 3.8                  | 4.1       |
| Median                                                                                    | 3.9         | 4.4                  | 4.5       | 3.5                  | 3.7       |
| Range                                                                                     | 0.7–19.4    | 1.2–19.6             | 0.7–23.1  | 1.3–15.9             | 0.9–28.0  |

\*Geometric Mean based on log transformed TNC dose.



**Table S3. Multivariate analyses of transplantation outcome end points, relative risks, 95% confidence intervals and P values**

| End point: Variable                                                                                                           | Number | RR* (95% CI)   | P value |
|-------------------------------------------------------------------------------------------------------------------------------|--------|----------------|---------|
| <b>Absolute Neutrophil Count (ANC) <math>\geq</math> 500/mm<sup>3</sup> by Day 77: (time unknown on 61 patients)</b>          |        |                |         |
| <u>HLA Mismatch (HLA-A, -B, -DRB1)/NIMA Match:</u>                                                                            |        |                |         |
| 0 HLA Mismatch                                                                                                                | 59     | 1.7 (1.2–2.3)  | 0.001   |
| 1–2 HLA Mismatch, NIMA Match                                                                                                  | 73     | 1.3 (1.01–1.7) | 0.043   |
| 1–2 HLA Mismatch, no NIMA Match                                                                                               | 928    | Reference      |         |
| <u>HLA Mismatch (HLA-A, -B, -DRB1):</u>                                                                                       |        |                |         |
| 1 HLA Mismatch                                                                                                                | 366    | Reference      |         |
| 2 HLA Mismatch                                                                                                                | 635    | 1.0 (0.9–1.2)  | 0.977   |
| TNC Dose/kg (natural log):                                                                                                    | 1060   | 1.5 (1.4–1.7)  | <0.001  |
| <u>Prior Transplant:</u>                                                                                                      |        |                |         |
| None                                                                                                                          | 903    | Reference      |         |
| Allogeneic                                                                                                                    | 35     | 0.8 (0.5–1.2)  | 0.300   |
| Autologous                                                                                                                    | 64     | 1.4 (1.1–1.9)  | 0.012   |
| Unknown                                                                                                                       | 58     | 0.5 (0.4–0.8)  | 0.001   |
| <u>GvHD Prophylaxis:</u>                                                                                                      |        |                |         |
| CSA/Steroids only                                                                                                             | 531    | Reference      |         |
| Methotrexate                                                                                                                  | 163    | 0.8 (0.7–1.02) | 0.082   |
| Tacrolimus                                                                                                                    | 84     | 0.9 (0.7–1.2)  | 0.635   |
| Other                                                                                                                         | 93     | 0.8 (0.6–1.05) | 0.103   |
| Unknown                                                                                                                       | 189    | 0.7 (0.5–0.8)  | 0.001   |
| <u>Center /NYBC CB Units:</u>                                                                                                 |        |                |         |
| Non-US Center                                                                                                                 | 253    | 0.7 (0.6–0.8)  | <0.001  |
| US Center/<50 Units                                                                                                           | 461    | 0.9 (0.8–1.1)  | 0.195   |
| US Center/ $\geq$ 50 Units                                                                                                    | 346    | Reference      |         |
| <u>Transplant Year:</u>                                                                                                       |        |                |         |
| 1993–2002                                                                                                                     | 773    | Reference      |         |
| 2003–2006                                                                                                                     | 287    | 1.7 (1.4–2.0)  | <0.001  |
| <b>Platelet Count <math>\geq</math>50,000/mm<sup>3</sup> by Day 270: (time unknown on 107 patients)</b>                       |        |                |         |
| <u>HLA Mismatch (HLA-A, -B, -DRB1)/NIMA Match:</u>                                                                            |        |                |         |
| 0 HLA Mismatch                                                                                                                | 55     | 1.7 (1.2–2.4)  | 0.003   |
| 1–2 HLA Mismatch, NIMA Match                                                                                                  | 76     | 1.0 (0.7–1.4)  | 0.821   |
| 1–2 HLA Mismatch, no NIMA Match                                                                                               | 883    | Reference      |         |
| <u>HLA Mismatch (HLA-A, -B, -DRB1):</u>                                                                                       |        |                |         |
| 1 HLA Mismatch                                                                                                                | 351    | Reference      |         |
| 2 HLA Mismatch                                                                                                                | 608    | 0.9 (0.8–1.1)  | 0.456   |
| TNC Dose/kg (natural log):                                                                                                    | 1014   | 1.4 (1.2–1.7)  | 0.001   |
| <u>Ethnicity:</u>                                                                                                             |        |                |         |
| Non-Caucasian                                                                                                                 | 438    | 0.7 (0.6–0.9)  | 0.003   |
| Caucasian                                                                                                                     | 554    | Reference      |         |
| Unknown                                                                                                                       | 22     | 0.9 (0.5–1.6)  | 0.688   |
| <u>Patient Age at Transplant:</u>                                                                                             |        |                |         |
| <10 Years                                                                                                                     | 522    | Reference      |         |
| $\geq$ 10 Years                                                                                                               | 492    | 0.6 (0.5–0.8)  | <0.001  |
| <u>Preparatory Regimen:</u>                                                                                                   |        |                |         |
| Myeloablative                                                                                                                 | 860    | Reference      |         |
| Non-Myeloablative                                                                                                             | 36     | 2.3 (1.4–3.8)  | 0.001   |
| Unknown                                                                                                                       | 118    | 1.0 (0.7–1.4)  | 0.798   |
| <u>GvHD Prophylaxis:</u>                                                                                                      |        |                |         |
| CSA/Steroids only                                                                                                             | 518    | Reference      |         |
| Methotrexate                                                                                                                  | 161    | 1.5 (1.1–1.9)  | 0.003   |
| Tacrolimus                                                                                                                    | 82     | 1.1 (0.8–1.6)  | 0.569   |
| Other                                                                                                                         | 89     | 1.1 (0.8–1.6)  | 0.489   |
| Unknown                                                                                                                       | 164    | 1.3 (0.9–1.7)  | 0.136   |
| <u>Center/NYBC CB Units:</u>                                                                                                  |        |                |         |
| Non-US Center                                                                                                                 | 236    | 0.7 (0.6–0.96) | 0.026   |
| US Center/<50 Units                                                                                                           | 440    | 0.8 (0.6–1.01) | 0.061   |
| US Center/ $\geq$ 50 Units                                                                                                    | 338    | Reference      |         |
| <u>Transplant Year:</u>                                                                                                       |        |                |         |
| 1993–2002                                                                                                                     | 752    | Reference      |         |
| 2003–2006                                                                                                                     | 262    | 1.8 (1.4–2.2)  | <0.001  |
| <b>Acute Grade 2–4 Graft vs. Host Disease (GvHD) by Day 150 in Patients who Engrafted: (data not reported on 73 patients)</b> |        |                |         |
| <u>HLA Mismatch (HLA-A, -B, -DRB1)/NIMA Match:</u>                                                                            |        |                |         |
| 0 HLA Mismatch                                                                                                                | 47     | 0.6 (0.4–1.1)  | 0.092   |
| 1–2 HLA Mismatch, NIMA Match                                                                                                  | 52     | 0.7 (0.4–1.1)  | 0.120   |

| End point: Variable                                                                                                                 | Number | RR* (95% CI)   | P value |
|-------------------------------------------------------------------------------------------------------------------------------------|--------|----------------|---------|
| 1-2 HLA Mismatch, no NIMA Match                                                                                                     | 634    | Reference      |         |
| <u>HLA Mismatch (HLA-A, -B, -DRB1):</u>                                                                                             |        |                |         |
| 1 HLA Mismatch                                                                                                                      | 254    | Reference      |         |
| 2 HLA Mismatch                                                                                                                      | 432    | 1.3 (1.1-1.7)  | 0.013   |
| <u>GvHD Prophylaxis:</u>                                                                                                            |        |                |         |
| CSA/Steroids only                                                                                                                   | 423    | Reference      |         |
| Methotrexate                                                                                                                        | 119    | 0.9 (0.6-1.2)  | 0.406   |
| Tacrolimus                                                                                                                          | 62     | 0.6 (0.4-0.96) | 0.033   |
| Other                                                                                                                               | 66     | 1.0 (0.7-1.4)  | 0.868   |
| Unknown                                                                                                                             | 63     | 1.4 (0.95-2.0) | 0.089   |
| <u>Center/NYBC CB Units:</u>                                                                                                        |        |                |         |
| Non-US Center                                                                                                                       | 153    | 1.2 (0.9-1.6)  | 0.328   |
| US Center/<50 Units                                                                                                                 | 309    | 1.8 (1.4-2.3)  | <0.001  |
| US Center/≥50 Units                                                                                                                 | 271    | Reference      |         |
| <b>Acute Grade 3-4 Graft vs. Host Disease (GvHD) by Day 150 in Patients who Engrafted: (data not reported on 73 patients)</b>       |        |                |         |
| <u>HLA Mismatch (HLA-A, -B, -DRB1)/NIMA Match:</u>                                                                                  |        |                |         |
| 0 HLA Mismatch                                                                                                                      | 47     | 0.3 (0.1-0.9)  | 0.028   |
| 1-2 HLA Mismatch, NIMA Match                                                                                                        | 52     | 0.9 (0.5-1.6)  | 0.693   |
| 1-2 HLA Mismatch, no NIMA Match                                                                                                     | 634    | Reference      |         |
| <b>Chronic Graft vs. Host Disease (GvHD) in Patients who Engrafted and Survived to Day 100: (data not reported on 139 patients)</b> |        |                |         |
| <u>HLA Mismatch (HLA-A, -B, -DRB1)/NIMA Match:</u>                                                                                  |        |                |         |
| 0 HLA Mismatch                                                                                                                      | 33     | 0.9 (0.4-1.8)  | 0.677   |
| 1-2 HLA Mismatch, NIMA Match                                                                                                        | 34     | 1.1 (0.6-1.9)  | 0.839   |
| 1-2 HLA Mismatch, no NIMA Match                                                                                                     | 370    | Reference      |         |
| <u>HLA Mismatch (HLA-A, -B, -DRB1):</u>                                                                                             |        |                |         |
| 1 HLA Mismatch                                                                                                                      | 161    | Reference      |         |
| 2 HLA Mismatch                                                                                                                      | 243    | 1.3 (0.9-1.8)  | 0.202   |
| <u>Ethnicity:</u>                                                                                                                   |        |                |         |
| Non-Caucasian                                                                                                                       | 179    | 1.4 (0.98-2.0) | 0.062   |
| Caucasian                                                                                                                           | 250    | Reference      |         |
| Unknown                                                                                                                             | 8      | 1.0 (0.3-4.3)  | 0.959   |
| <u>Patient Age at Transplant:</u>                                                                                                   |        |                |         |
| <10 Years                                                                                                                           | 247    | Reference      |         |
| ≥10 Years                                                                                                                           | 190    | 2.1 (1.5-3.0)  | <0.001  |
| <u>Center/NYBC CB Units:</u>                                                                                                        |        |                |         |
| Non-US Center                                                                                                                       | 78     | 1.6 (0.95-2.6) | 0.076   |
| US Center/<50 Units                                                                                                                 | 185    | 2.1 (1.5-3.1)  | <0.001  |
| US Center/≥50 Units                                                                                                                 | 174    | Reference      |         |
| <b>Relapse rate Over Three Years:</b>                                                                                               |        |                |         |
| <u>HLA Mismatch (HLA-A, -B, -DRB1)/NIMA Match:</u>                                                                                  |        |                |         |
| 0 HLA Mismatch                                                                                                                      | 62     | 0.7 (0.4-1.2)  | 0.225   |
| 1-2 HLA Mismatch, NIMA Match                                                                                                        | 79     | 0.8 (0.5-1.3)  | 0.336   |
| 1-2 HLA Mismatch, no NIMA Match                                                                                                     | 980    | Reference      |         |
| <u>HLA Mismatch (HLA-A, -B, -DRB1):</u>                                                                                             |        |                |         |
| 1 HLA Mismatch                                                                                                                      | 388    | Reference      |         |
| 2 HLA Mismatch                                                                                                                      | 671    | 0.8 (0.6-1.1)  | 0.177   |
| <u>Diagnosis:</u>                                                                                                                   |        |                |         |
| ALL                                                                                                                                 | 451    | Reference      |         |
| AML                                                                                                                                 | 376    | 1.4 (1.03-1.9) | 0.032   |
| CML                                                                                                                                 | 116    | 0.6 (0.3-1.2)  | 0.133   |
| Other Leukemia                                                                                                                      | 53     | 1.8 (1.02-3.2) | 0.043   |
| Lymphoma/Multiple Myeloma                                                                                                           | 46     | 2.4 (1.3-4.4)  | 0.003   |
| Myelodysplasia                                                                                                                      | 79     | 1.2 (0.7-2.1)  | 0.514   |
| <u>Risk (IBMTR Categories):</u>                                                                                                     |        |                |         |
| High (ALL, AML, CML)                                                                                                                | 242    | 1.9 (1.4-2.6)  | <0.001  |
| All Others                                                                                                                          | 834    | Reference      |         |
| Unknown (ALL, AML, CML)                                                                                                             | 45     | 0.9 (0.4-2.1)  | 0.864   |
| <b>Transplant-Related Mortality (TRM) over 3 Years.</b>                                                                             |        |                |         |
| <u>HLA Mismatch (HLA-A, -B, -DRB1)/NIMA Match:</u>                                                                                  |        |                |         |
| 0 HLA Mismatch                                                                                                                      | 62     | 0.4 (0.2-0.7)  | 0.004   |
| 1-2 HLA Mismatch, NIMA Match                                                                                                        | 79     | 0.7 (0.5-0.97) | 0.034   |
| 1-2 HLA Mismatch, no NIMA Match                                                                                                     | 980    | Reference      |         |
| <u>HLA Mismatch (HLA-A, -B, -DRB1):</u>                                                                                             |        |                |         |
| 1 HLA Mismatch                                                                                                                      | 388    | Reference      |         |
| 2 HLA Mismatch                                                                                                                      | 671    | 1.3 (1.03-1.5) | 0.022   |

| End point: Variable                                     | Number | RR* (95% CI)   | P value |
|---------------------------------------------------------|--------|----------------|---------|
| <b>TNC Dose/kg (natural log):</b>                       | 1121   | 0.8 (0.6–0.9)  | 0.004   |
| <b>Patient Age at Transplant:</b>                       |        |                |         |
| <10 Years                                               | 570    | Reference      |         |
| ≥10 Years                                               | 551    | 1.6 (1.2–2.0)  | <0.001  |
| <b>Ethnicity:</b>                                       |        |                |         |
| Non-Caucasian                                           | 489    | 1.3 (1.1–1.6)  | 0.006   |
| Caucasian                                               | 601    | Reference      |         |
| Unknown                                                 | 31     | 1.1 (0.6–2.0)  | 0.722   |
| <b>Risk (IBMTR Categories):</b>                         |        |                |         |
| High (ALL, AML, CML)                                    | 242    | 1.3 (1.1–1.6)  | 0.008   |
| All Others                                              | 834    | Reference      |         |
| Unknown (ALL, AML, CML)                                 | 45     | 1.3 (0.8–2.0)  | 0.315   |
| <b>Prior Transplant:</b>                                |        |                |         |
| None                                                    | 927    | Reference      |         |
| Allogeneic                                              | 35     | 1.4 (0.8–2.3)  | 0.189   |
| Autologous                                              | 66     | 0.8 (0.6–1.2)  | 0.372   |
| Unknown                                                 | 93     | 0.9 (0.5–1.4)  | 0.515   |
| <b>Pre-Transplant CMV Antibody:</b>                     |        |                |         |
| Negative                                                | 451    | Reference      |         |
| Positive                                                | 520    | 1.3 (1.1–1.6)  | 0.006   |
| Unknown                                                 | 150    | 1.6 (1.1–2.4)  | 0.026   |
| <b>Center/NYBC CB Units:</b>                            |        |                |         |
| Non-US Center                                           | 281    | 1.8 (1.4–2.3)  | <0.001  |
| US Center/<50 Units                                     | 488    | 1.5 (1.2–1.8)  | 0.001   |
| US Center/≥50 Units                                     | 352    | Reference      |         |
| <b>Transplant Year:</b>                                 |        |                |         |
| 1993–2002                                               | 803    | Reference      |         |
| 2003–2006                                               | 318    | 0.6 (0.4–0.7)  | <0.001  |
| <b>Overall Mortality in Three Years:</b>                |        |                |         |
| <b>HLA Mismatch (HLA-A, -B, -DRB1)/NIMA Match:</b>      |        |                |         |
| 0 HLA Mismatch                                          | 62     | 0.5 (0.3–0.8)  | 0.002   |
| 1–2 HLA Mismatch, NIMA Match                            | 79     | 0.7 (0.5–0.97) | 0.029   |
| 1–2 HLA Mismatch, no NIMA Match                         | 980    | Reference      |         |
| <b>HLA Mismatch (HLA-A, -B, -DRB1):</b>                 |        |                |         |
| 1 HLA Mismatch                                          | 388    | Reference      |         |
| 2 HLA Mismatch                                          | 671    | 1.1 (0.9–1.3)  | 0.275   |
| <b>TNC Dose/kg (natural log):</b>                       | 1121   | 0.8 (0.7–0.97) | 0.019   |
| <b>Patient Age at Transplant:</b>                       |        |                |         |
| <10 Years                                               | 570    | Reference      |         |
| ≥10 Years                                               | 551    | 1.4 (1.1–1.7)  | 0.003   |
| <b>Ethnicity:</b>                                       |        |                |         |
| Non-Caucasian                                           | 489    | 1.2 (1.02–1.4) | 0.025   |
| Caucasian                                               | 601    | Reference      |         |
| Unknown                                                 | 31     | 1.1 (0.6–1.8)  | 0.742   |
| <b>Risk (IBMTR Categories):</b>                         |        |                |         |
| High (ALL, AML, CML)                                    | 242    | 1.5 (1.3–1.8)  | <0.001  |
| All Others                                              | 834    | Reference      |         |
| Unknown (ALL, AML, CML)                                 | 45     | 1.2 (0.8–1.9)  | 0.336   |
| <b>Prior Transplant:</b>                                |        |                |         |
| None                                                    | 927    | Reference      |         |
| Allogeneic                                              | 35     | 1.4 (0.9–2.1)  | 0.136   |
| Autologous                                              | 66     | 1.0 (0.7–1.3)  | 0.838   |
| Unknown                                                 | 93     | 0.9 (0.6–1.3)  | 0.589   |
| <b>Pre-Transplant CMV Antibody:</b>                     |        |                |         |
| Negative                                                | 451    | Reference      |         |
| Positive                                                | 520    | 1.2 (1.04–1.4) | 0.017   |
| Unknown                                                 | 150    | 1.4 (1.00–2.0) | 0.048   |
| <b>Center/NYBC CB Units:</b>                            |        |                |         |
| Non-US Center                                           | 281    | 1.5 (1.2–1.9)  | <0.001  |
| US Center/<50 Units                                     | 488    | 1.4 (1.2–1.7)  | <0.001  |
| US Center ≥50 Units                                     | 352    | Reference      |         |
| <b>Transplant Year:</b>                                 |        |                |         |
| 1993–2002                                               | 803    | Reference      |         |
| 2003–2006                                               | 318    | 0.7 (0.6–0.9)  | 0.001   |
| <b>Treatment Failure (Relapse or Death) in 3 Years:</b> |        |                |         |

| End point: Variable                                | Number | RR* (95% CI)   | P value |
|----------------------------------------------------|--------|----------------|---------|
| <u>HLA Mismatch (HLA-A, -B, -DRB1)/NIMA Match:</u> |        |                |         |
| 0 HLA Mismatch                                     | 62     | 0.5 (0.3–0.8)  | 0.002   |
| 1–2 HLA Mismatch, NIMA Match                       | 79     | 0.7 (0.6–0.99) | 0.049   |
| 1–2 HLA Mismatch, no NIMA Match                    | 980    | Reference      |         |
| <u>HLA Mismatch (HLA-A, -B, -DRB1):</u>            |        |                |         |
| 1 HLA Mismatch                                     | 388    | Reference      |         |
| 2 HLA Mismatch                                     | 671    | 1.1 (0.9–1.3)  | 0.248   |
| <u>TNC Dose/kg (natural log):</u>                  | 1121   | 0.9 (0.7–1.02) | 0.080   |
| <u>Patient Age at Transplant:</u>                  |        |                |         |
| <10 Years                                          | 570    | Reference      |         |
| ≥10 Years                                          | 551    | 1.3 (1.1–1.6)  | 0.004   |
| <u>Ethnicity:</u>                                  |        |                |         |
| Non-Caucasian                                      | 489    | 1.2 (0.99–1.4) | 0.060   |
| Caucasian                                          | 601    | Reference      |         |
| Unknown                                            | 31     | 1.1 (0.7–1.8)  | 0.656   |
| <u>Risk (IBMTR Categories):</u>                    |        |                |         |
| High (ALL, AML, CML)                               | 242    | 1.5 (1.3–1.8)  | <0.001  |
| All Others                                         | 834    | Reference      |         |
| Unknown (ALL, AML, CML)                            | 45     | 1.1 (0.8–1.7)  | 0.514   |
| <u>Prior Transplant:</u>                           |        |                |         |
| None                                               | 927    | Reference      |         |
| Allogeneic                                         | 35     | 1.5 (1.00–2.2) | 0.048   |
| Autologous                                         | 66     | 1.0 (0.7–1.3)  | 0.914   |
| Unknown                                            | 93     | 0.9 (0.6–1.3)  | 0.544   |
| <u>Pre-Transplant CMV Antibody:</u>                |        |                |         |
| Negative                                           | 451    | Reference      |         |
| Positive                                           | 520    | 1.2 (1.02–1.4) | 0.027   |
| Unknown                                            | 150    | 1.4 (0.97–1.9) | 0.072   |
| <u>Center/NYBC CB Units:</u>                       |        |                |         |
| Non-US Center                                      | 281    | 1.5 (1.2–1.8)  | <0.001  |
| US Center/<50 Units                                | 488    | 1.4 (1.2–1.6)  | <0.001  |
| US Center/≥50 Units                                | 352    | Reference      |         |
| <u>Transplant Year:</u>                            |        |                |         |
| 1993–2002                                          | 803    | Reference      |         |
| 2003–2006                                          | 318    | 0.7 (0.6–0.9)  | 0.001   |
